# Supplementary material for: Compound heterozygous IFT140 variants in two Polish families with Sensenbrenner syndrome and early onset end-stage renal disease
Source: PubMed Central journal article supplement (PMC6995138; doi:10.1186/s13023-020-1303-2), 2020-02-01
Supplement: 13023_2020_1303_MOESM1_ESM.pdf [file 13023_2020_1303_MOESM1_ESM.pdf]

List of genes and SNPs included in the NGS panel

|     |                |     |                   |
|-----|----------------|-----|-------------------|
| 1.  | <i>ALPL</i>    | 37. | <i>POLR1C</i>     |
| 2.  | <i>ALX1</i>    | 38. | <i>POLR1D</i>     |
| 3.  | <i>ALX3</i>    | 39. | <i>POR</i>        |
| 4.  | <i>ALX4</i>    | 40. | <i>RAB23</i>      |
| 5.  | <i>BMP4</i>    | 41. | <i>RECQL4</i>     |
| 6.  | <i>CYP26B1</i> | 42. | <i>RET</i>        |
| 7.  | <i>DHODH</i>   | 43. | <i>RSPRY1</i>     |
| 8.  | <i>DPH1</i>    | 44. | <i>RUNX2</i>      |
| 9.  | <i>EDN3</i>    | 45. | <i>SF3B4</i>      |
| 10. | <i>EDNRB</i>   | 46. | <i>SIX2</i>       |
| 11. | <i>EFNA4</i>   | 47. | <i>SKI</i>        |
| 12. | <i>EFNB1</i>   | 48. | <i>SMAD6</i>      |
| 13. | <i>EFTUD2</i>  | 49. | <i>SMURF1</i>     |
| 14. | <i>ERF</i>     | 50. | <i>SOX10</i>      |
| 15. | <i>ESCO2</i>   | 51. | <i>SPRY1</i>      |
| 16. | <i>FGFR1</i>   | 52. | <i>SPRY4</i>      |
| 17. | <i>FGFR2</i>   | 53. | <i>TCF12</i>      |
| 18. | <i>FGFR3</i>   | 54. | <i>TCOF1</i>      |
| 19. | <i>FIG4</i>    | 55. | <i>TGFBR1</i>     |
| 20. | <i>FLNB</i>    | 56. | <i>TGFBR2</i>     |
| 21. | <i>FREM1</i>   | 57. | <i>TTR</i>        |
| 22. | <i>GDF5</i>    | 58. | <i>TWIST1</i>     |
| 23. | <i>GLI3</i>    | 59. | <i>WDR19</i>      |
| 24. | <i>IFT122</i>  | 60. | <i>WDR35</i>      |
| 25. | <i>IFT140</i>  | 61. | <i>ZIC1</i>       |
| 26. | <i>IFT43</i>   | 62. | <i>rs1009355</i>  |
| 27. | <i>IFT52</i>   | 63. | <i>rs10254116</i> |
| 28. | <i>IHH</i>     | 64. | <i>rs10262453</i> |
| 29. | <i>IL11RA</i>  | 65. | <i>rs1420154</i>  |
| 30. | <i>MASP1</i>   | 66. | <i>rs142092</i>   |
| 31. | <i>MEGF8</i>   | 67. | <i>rs179753</i>   |
| 32. | <i>MITF</i>    | 68. | <i>rs1884302</i>  |
| 33. | <i>MSX2</i>    | 69. | <i>rs4140470</i>  |
| 34. | <i>NOG</i>     | 70. | <i>rs6054814</i>  |
| 35. | <i>P4HB</i>    | 71. | <i>rs6107929</i>  |
| 36. | <i>PAX3</i>    | 72. | <i>rs6140226</i>  |
