# Supplementary material for: Compound heterozygous IFT140 variants in two Polish families with Sensenbrenner syndrome and early onset end-stage renal disease
Source: PubMed Central journal article supplement (PMC6995138; doi:10.1186/s13023-020-1303-2), 2020-02-01
Supplement: 13023_2020_1303_MOESM2_ESM.pdf [file 13023_2020_1303_MOESM2_ESM.pdf]

List of primer sequences used for PCR, Sanger sequencing and qPCR.

| <b>Application</b>        | <b>Exon</b> | <b>Forward primer sequence<br/>5'-3'</b> | <b>Reverse primer sequence<br/>5'-3'</b> |
|---------------------------|-------------|------------------------------------------|------------------------------------------|
| PCR and Sanger sequencing | 4           | ttgcctctcatccaatgcag                     | cgagcatggtcagaaaggt                      |
| PCR and Sanger sequencing | 14          | gcgagtgaatgagtggagtg                     | tgtcgggtttaaagtggca                      |
| qPCR                      | 26          | GCTCAGAGCCCACCGTATC                      | GAGCTGTAGGGCCACAACT                      |
| qPCR                      | 27          | gcaccttgacagTATCAGGA                     | TCATCTTTTCCGCCATCTC                      |
| qPCR                      | 28          | GAGCCGGAGATCATGAAGAA                     | GGCACAAGCGTCATAAAAG                      |
| qPCR                      | 29          | TGGCACTGGTGAAGAGGTTT                     | CCCTGTAGTCACATCTGCCC                     |
| qPCR                      | 30          | CCATCAAGCAGTGTGAGCTG                     | TCCACCAGGAAGCCATAGAC                     |
| qPCR                      | 31          | gccccagGCCTACAGATTC                      | CTGCGGGCTCACGTAGTAG                      |
